# Supplementary material
Source: ML conference proceedings conference paper supplement (https://openaccess.thecvf.com/content/CVPR2026/html/Ma_ApET_Approximation-Error_Guided_CVPR_2026_paper.html)
Supplement: Supplementary file 1 [file Ma_ApET_Approximation-Error_Guided_CVPR_2026_supplemental.pdf]

# Supplementary Materials

In the appendix, we provide comprehensive details including benchmark specifications, extended ablation study results, and supplementary visualizations.

## A. Benchmark Details

We conducted experiments on these widely used benchmarks:

**GQA.** The GQA [5] benchmark evaluates compositional visual reasoning through scene graph-driven question-answering. It assesses spatial understanding, attribute recognition, and multi-step inference capabilities using real-world images paired with structurally annotated questions.

**POPE.** POPE [7] measures object hallucination in large vision-language models via binary presence queries. It employs accuracy, precision, recall, and F1-score across three object sampling strategies to characterize false positive generation tendencies.

**MME.** MME [2] provides a comprehensive evaluation across 14 perceptual and cognitive subtasks through manually curated instruction-response pairs, specifically designed to mitigate evaluation data contamination.

**ScienceQA.** ScienceQA [9] benchmarks multimodal scientific reasoning across natural, social, and language sciences. Its hierarchical taxonomy and multi-choice format test models’ capacity for domain-specific knowledge integration and logical inference.

**TextVQA.** TextVQA [10] evaluates text-rich visual reasoning by requiring models to read, localize, and comprehend textual elements within natural images to answer open-ended questions.

**VizWiz.** VizWiz [4] contains 31,000+ visual questions captured by blind users via mobile devices. This unique dataset challenges models with low-quality images, conversational spoken-style queries, and inherent unanswerable questions due to visual ambiguity.

**MMBench.** MMBench [8] employs a three-level hierarchical taxonomy spanning 20 fine-grained ability dimensions. Its circular evaluation strategy and comprehensive coverage enable systematic assessment of both perception and reasoning capabilities.

Table 1. **Ablation study on approximation error metrics across three image understanding tasks.** Experiments are performed with LLaVA-1.5-7B and Qwen2.5-VL-7B at token compression ratios of 11.1% and 10%, respectively.

| Model         | Method            | GQA         | POPE        | MME         |
|---------------|-------------------|-------------|-------------|-------------|
| LLaVA-1.5-7B  | Cosine Similarity | 54.1        | 80.9        | 1576        |
|               | L1 Norm           | 56.6        | 84.0        | 1685        |
|               | L2 Norm           | <b>56.9</b> | <b>84.4</b> | <b>1714</b> |
| Qwen2.5-VL-7B | Cosine Similarity | 54.7        | 81.1        | 1909        |
|               | L1 Norm           | 55.9        | 82.0        | 2014        |
|               | L2 Norm           | <b>56.1</b> | <b>82.4</b> | <b>2055</b> |

**VQA-v2.** VQA-v2 [3] evaluates general visual understanding using 265K real-world images with open-ended questions. Each question includes 10 human-annotated answers to address annotation ambiguity and enable robust performance measurement.

**TGIF.** TGIF [6] extends visual QA to the video domain with 165K QA pairs derived from animated GIFs. It comprises four task categories: three spatio-temporal reasoning tasks (repetition counting, action localization, state transition) and single-frame QA, requiring integrated motion and content understanding.

**MSVD.** The MSVD [1] benchmark comprises 1,970 video clips with 50.5K open-ended questions across five categories (what, who, how, when, where), supporting both video question answering and captioning evaluation.

**MSRVTT.** MSRVTT [11] challenges models with 243K questions over 10K diverse video clips. Its five question types assess comprehensive video understanding by requiring integration of spatial, temporal, and semantic information.

## B. More Ablation Studies

Our work employs approximation errors to quantify token significance. Table 1 presents a comparative evaluation of three metrics:  $\ell_1$ -norm,  $\ell_2$ -norm and Cosine Similarity. Results demonstrate that the  $\ell_2$ -norm metric yields superior performance on both LLaVA-1.5-7B and Qwen2.5-VL-7B models, motivating its adoption as the approximation error measure in ApET.

Query: Is the fence made of cement or aluminum?

Answer: Aluminum

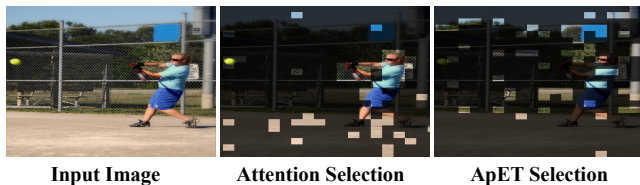

Query: How does that car look like, orange or maybe white?

Answer: White

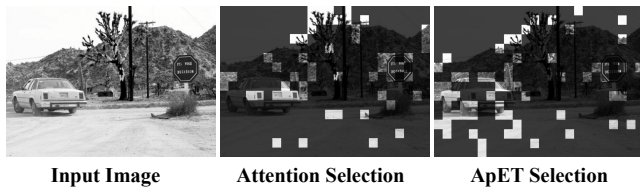

Query: Is the field soft and snowy?

Answer: No

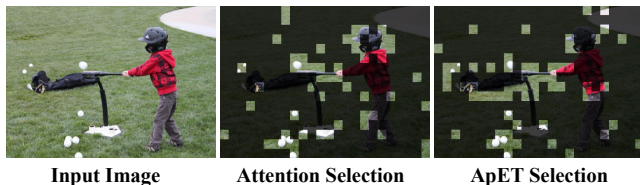

Query: Are there beds next to the small outlet?

Answer: Yes

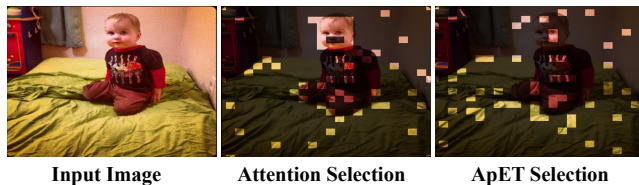

Query: Is the ground blue or brown?

Answer: Brown

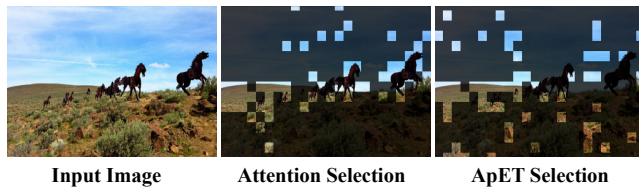

Query: Is the cake on a platter?

Answer: No

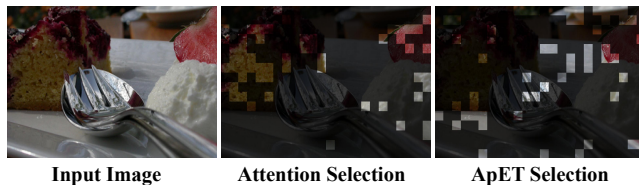

Figure 1. **Visualization of token compression.** We present more representative failure cases in which attention-driven token selection misguides the final prediction. For each case, we visualize the input question and its ground-truth answer, the original image, the subset of visual tokens preserved when ranking by attention weights, and the subset preserved by the approximation-error criterion proposed in this work. The retained tokens are highlighted for clear comparison.

### C. More Visualizations

In Figure 1, we present supplementary visualizations of ApET’s token compression across diverse scenarios. These results demonstrate that approximation-error-based token filtering effectively retains semantically rich visual tokens without requiring attention mechanisms.

### References

- [1] David Chen and William B Dolan. Collecting highly parallel data for paraphrase evaluation. In *Proceedings of the 49th annual meeting of the association for computational linguistics: human language technologies*, pages 190–200, 2011. 1
- [2] Chaoyou Fu, Peixian Chen, Yunhang Shen, Yulei Qin, Mengdan Zhang, Xu Lin, Jinrui Yang, Xiawu Zheng, Ke Li, Xing Sun, et al. Mme: A comprehensive evaluation benchmark for multimodal large language models. In *The Thirty-ninth Annual Conference on Neural Information Processing Systems Datasets and Benchmarks Track*, 2025. 1
- [3] Yash Goyal, Tejas Khot, Douglas Summers-Stay, Dhruv Batra, and Devi Parikh. Making the v in vqa matter: Elevating the role of image understanding in visual question answer-  
ing. In *Proceedings of the IEEE conference on computer vision and pattern recognition*, pages 6904–6913, 2017. 1
- [4] Danna Gurari, Qing Li, Abigale J Stangl, Anhong Guo, Chi Lin, Kristen Grauman, Jiebo Luo, and Jeffrey P Bigham. Vizviz grand challenge: Answering visual questions from blind people. In *Proceedings of the IEEE conference on computer vision and pattern recognition*, pages 3608–3617, 2018. 1
- [5] Drew A Hudson and Christopher D Manning. Gqa: A new dataset for real-world visual reasoning and compositional question answering. In *Proceedings of the IEEE/CVF conference on computer vision and pattern recognition*, pages 6700–6709, 2019. 1
- [6] Yunseok Jang, Yale Song, Youngjae Yu, Youngjin Kim, and Gunhee Kim. Tgif-qa: Toward spatio-temporal reasoning in visual question answering. In *Proceedings of the IEEE conference on computer vision and pattern recognition*, pages 2758–2766, 2017. 1
- [7] Yifan Li, Yifan Du, Kun Zhou, Jinpeng Wang, Wayne Xin Zhao, and Ji-Rong Wen. Evaluating object hallucination in large vision-language models. *arXiv preprint arXiv:2305.10355*, 2023. 1
- [8] Yuan Liu, Haodong Duan, Yuanhan Zhang, Bo Li, Songyang Zhang, Wangbo Zhao, Yike Yuan, Jiaqi Wang, Conghui He,

- Ziwei Liu, et al. Mmbench: Is your multi-modal model an all-around player? In *European conference on computer vision*, pages 216–233. Springer, 2024. [1](#)
- [9] Pan Lu, Swaroop Mishra, Tanglin Xia, Liang Qiu, Kai-Wei Chang, Song-Chun Zhu, Oyvind Tafjord, Peter Clark, and Ashwin Kalyan. Learn to explain: Multimodal reasoning via thought chains for science question answering. *Advances in Neural Information Processing Systems*, 35:2507–2521, 2022. [1](#)
- [10] Amanpreet Singh, Vivek Natarajan, Meet Shah, Yu Jiang, Xinlei Chen, Dhruv Batra, Devi Parikh, and Marcus Rohrbach. Towards vqa models that can read. In *Proceedings of the IEEE/CVF conference on computer vision and pattern recognition*, pages 8317–8326, 2019. [1](#)
- [11] Jun Xu, Tao Mei, Ting Yao, and Yong Rui. Msr-vtt: A large video description dataset for bridging video and language. In *Proceedings of the IEEE conference on computer vision and pattern recognition*, pages 5288–5296, 2016. [1](#)
